# Supplementary material
Source: Research Square preprint supplement (doi:10.21203/rs.3.rs-10081894/v1)
Supplement: Supplementary file 1 [file 229f9d3baac230fbc41d82d2.docx]

**Supplementary Information**

**Workplace Health Investment and Employment Adjustment: Public Health Evidence from CSR Reports of Chinese A-share Listed Firms**

Mingcheng Gao and Kangsi Zhang*

School of Economics, Dongbei University of Finance and Economics, Dalian 116025, Liaoning, China

# Appendix A. Sample construction

**Supplementary Table S1. Sample construction.**

| Step | Firm-year observations |
| --- | --- |
| Initial A-share firm-year observations (2013-2024) | 47,862 |
| Drop financial firms | -1,936 |
| Drop ST, *ST and PT firms | -3,418 |
| Drop observations with missing employee counts | -8,742 |
| Drop missing financial controls | -5,906 |
| Drop observations without valid CSR text | -13,574 |
| Apply CSR text-quality filter: at least 100 valid CSR sentences | -1,617 |
| Baseline sample | 12,669 |

Notes: Sample screening is at the firm-year level and applies the CSR text-quality filter used in FinBERT2 classification.

# **Appendix B. Text-classifier confusion matrix**

**Supplementary Table S2. Test-set confusion matrix.**

| Manual label / model prediction | Predicted positive | Predicted negative | Total |
| --- | --- | --- | --- |
| Manual positive | 837 | 31 | 868 |
| Manual negative | 47 | 322 | 369 |
| Total | 884 | 353 | 1,237 |

Notes: The test set is obtained from an 8:1:1 split of the manually labeled sample.

# **Appendix C. Alternative fixed effects, clustering and winsorization**

**Supplementary Table S3. Additional robustness tests.**

| Specification | Employment growth | Adjustment volatility | Controls | Fixed effects | N |
| --- | --- | --- | --- | --- | --- |
| Industry-year fixed effects | 0.506*** (0.073) | 0.268** (0.120) | Yes | Yes | 12,669 / 10,734 |
| Province-year fixed effects | 0.494*** (0.076) | 0.256** (0.121) | Yes | Yes | 12,669 / 10,734 |
| Two-way clustered SE | 0.552*** (0.081) | 0.281** (0.128) | Yes | Yes | 12,669 / 10,734 |
| Unwinsorized sample | 0.537*** (0.070) | 0.274** (0.115) | Yes | Yes | 12,669 / 10,734 |

Notes: Specifications include firm characteristics, firm fixed effects and year fixed effects unless otherwise noted.

# **Appendix D. Extended mechanism chain**

**Supplementary Table S4. Extended health-friction mechanism.**

| Variable | Work-injury rate | Employee turnover | Vacancy-filling duration | Employment growth | Adjustment volatility |
| --- | --- | --- | --- | --- | --- |
| Workplace health investment | -0.086*** (0.022) | -0.119** (0.049) | -1.801** (0.728) |  |  |
| Work-injury rate |  |  | -0.065*** (0.020) | 0.121** (0.053) |  |
| Employee turnover |  |  |  | 0.146*** (0.045) | 0.208*** (0.060) |
| Vacancy-filling duration |  |  |  | -0.006** (0.003) | 0.009** (0.004) |
| Controls and fixed effects | Yes | Yes | Yes | Yes | Yes |
| N | 8,729 | 7,918 | 5,594 | 8,729 / 7,918 / 5,594 | 8,729 / 7,918 / 5,594 |

Notes: Higher values indicate stronger mechanism-variable friction.

# **Appendix E. CSR text identification and measurement of workplace health investment**

Workplace health investment is measured from CSR reports because employee health practices are often disclosed as institutions, management measures, welfare arrangements and responsibility practices rather than as separately reported monetary expenditures. The measure captures the relative intensity with which a firm discloses internal workplace health investment within its CSR report.

## **E1. Text data source and sample definition**

The raw text data cover 17,082 firm-year CSR reports issued by Chinese A-share listed firms from 2006 to 2024. The text-identification stage uses parseable CSR reports only. Firm-years without CSR reports are not assigned a zero workplace health-investment value at the measurement stage; they are treated as a potential disclosure-selection issue in the empirical design. The text library is used to train and validate the measurement procedure; the empirical baseline sample in the main analyses is restricted to 2013-2024 after merging with employee-count and financial-control variables.

**Supplementary Table S5. CSR text data and sample information.**

| Item | Definition | Number or share |
| --- | --- | --- |
| Raw CSR reports | 2006-2024 | 17,082 company-year reports |
| Parseable CSR reports | 2006-2024 | 17,041 company-year texts |
| Valid sentence-level text library | After cleaning and segmentation | 4,985,849 valid sentences |
| Candidate health-investment sentences | Dictionary recall and joint constraints | 689,301 sentences; 13.83% of valid sentences |
| Manual labelled sample | Stratified sentence sample | 14,475 sentences |
| Positive labels | Workplace health-investment sentences | 10,284; 71.0% |
| Negative labels | Non-employee-health or ambiguous sentences | 4,191; 29.0% |
| Text-quality filtered sample | CSR reports with at least 100 valid sentences | 14,007 company-year texts |
| Stricter text-quality sample | CSR reports with at least 200 valid sentences | 9,357 company-year texts |
| 2013-2024 text-quality filtered baseline sample | CSR reports with at least 100 valid sentences and matched baseline data | 12,669 company-year texts |

Notes: Text-quality filters refer to minimum valid-sentence requirements at text construction.

## **E2. Text preprocessing**

The preprocessing procedure removes repeated headers and footers, table-of-contents pages, figure and table indexes, residual table rows, abnormal encodings, non-informative symbols and duplicated sentences within the same report. CSR reports are segmented into sentences using Chinese and English sentence-ending punctuation. The retained sentence unit must contain at least 5 and no more than 1,000 Chinese characters. Pure-number sentences, pure-punctuation sentences, table-index sentences and semantically empty units are removed.

Text-quality flags are constructed before firm-year aggregation. A report with fewer than 500 valid Chinese characters is marked as a short-text report, and a report with fewer than 100 valid Chinese characters is marked as a noise file. These flags are used for text-quality checks and robustness analysis.

## **E3. Keyword dictionary and candidate-sentence recall**

A positive keyword dictionary is used to locate candidate sentences before supervised classification. The dictionary contains five substantive categories and a negative exclusion dictionary. Broad words such as health, safety and protection are used only under joint constraints: if a sentence hits only broad terms but does not contain employee-object words or investment-action words, it is not included in the candidate-sentence set.

**Supplementary Table S6. Keyword dictionary and recall structure.**

| Category | Code | Representative keywords or context | Number of terms |
| --- | --- | --- | --- |
| Occupational health and safety | OHS | Occupational health, safety production, labor protection, safety training | 40 |
| Medical security and health benefits | MEDICAL | Physical examination, supplementary medical insurance, health records, medical assistance | 28 |
| Mental health and employee care | MENTAL | Psychological counseling, EAP, stress management, employee care | 29 |
| Health promotion and lifestyle management | PROMOTION | Health lectures, fitness activities, health education, lifestyle intervention | 25 |
| Working environment and working-condition improvement | ENV | Work environment, heatstroke prevention, canteen, dormitory, female-worker protection | 30 |
| Negative exclusion dictionary | NEG | Healthy development, big health industry, customer health, industry health and other non-employee contexts | 20 |

Notes: Candidate-sentence records include keyword category and negative-exclusion flags.

## **E4. Manual annotation sample**

The manual annotation sample is constructed by multidimensional stratified sampling from candidate sentences. Stratification covers keyword category, report year, high-risk negative contexts and sentence length. A sentence is labelled positive only when the actor is the firm or its management, the object is internal employees, and the content refers to health, medical support, physical examination, occupational health, safety protection, labor protection, mental health, health promotion or working-condition improvement as an investment, institution, benefit or management practice.

**Supplementary Table S7. Annotation design and labelling rules.**

| Dimension | Implementation |
| --- | --- |
| Keyword category | Coverage of OHS, MEDICAL, MENTAL, PROMOTION and ENV candidate sentences |
| Report year | Coverage of CSR reports from 2006 to 2024 |
| High-risk negative context | Oversampling of health development, big health, customer health and similar false-positive contexts |
| Sentence length | Coverage of short sentences below 30 Chinese characters, medium sentences of 30-80 characters and long sentences above 80 characters |
| Positive label rule | Firm or management as actor; internal employees as object; health-related workplace investment, institution, benefit or management practice as content |
| Negative label rule | Business or macro healthy development, products or services, customers or public health, macro policy, incomplete semantics, unclear actor or unclear object |

Notes: The final labelled sample contains 14,475 sentences.

## **E5. FinBERT2 fine-tuning and model performance**

The candidate-sentence classifier is based on valuesimplex-ai-lab/FinBERT2-base [1]. FinBERT2-base is a Chinese financial-domain encoder further pre-trained on large-scale Chinese financial corpora, including research reports, news and corporate announcements. The model is fine-tuned as a binary classifier to predict the probability that a candidate sentence describes workplace health investment.

**Supplementary Table S8. Model fine-tuning settings.**

| Item | Setting |
| --- | --- |
| Base model | valuesimplex-ai-lab/FinBERT2-base |
| Architecture | RoBERTa-Base style Chinese financial encoder |
| Pre-training corpus | Chinese financial corpus of approximately 32 billion tokens |
| Training-validation-test split | 8:1:1 stratified split |
| Maximum sequence length | 256 tokens |
| Batch size | 32 |
| Optimizer | AdamW |
| Weight decay | 0.01 |
| Warm-up steps | 100 |
| Maximum epochs | 5 |
| Early stopping | Validation-set F1; patience 2 |
| Actual training epochs | 3 |
| Random seed | 42 |

Notes: Model selection uses validation-set F1 with early stopping.

**Supplementary Table S9. FinBERT2 test-set classification performance.**

| Metric | Value |
| --- | --- |
| Accuracy | 0.9369 |
| Precision | 0.9468 |
| Recall | 0.9643 |
| F1 | 0.9555 |
| AUC | 0.9838 |

Notes: The model meets the predefined text-measurement performance thresholds.

**Supplementary Table S10. Test-set confusion matrix.**

| Manual label / model prediction | Predicted positive | Predicted negative | Total |
| --- | --- | --- | --- |
| Manual positive | 837 | 31 | 868 |
| Manual negative | 47 | 322 | 369 |
| Total | 884 | 353 | 1,237 |

Notes: Higher precision limits overestimation risk; higher recall limits omission risk.

## **E6. Firm-year indicator construction**

After model training, the fine-tuned classifier is applied to all recalled candidate sentences. A sentence is classified as positive when its predicted probability is at least 0.50. The sentence-level predictions are then aggregated to the firm-year level.

HealthInvestmentᵢₜ = PosHealthSentencesᵢₜ / ValidSentencesᵢₜ (A1)

**Supplementary Table S11. Text-based workplace health-investment indicators.**

| Indicator | Construction | Interpretation |
| --- | --- | --- |
| HealthInvestmentᵢₜ | PosHealthSentencesᵢₜ / ValidSentencesᵢₜ | Core ratio measure |
| LogHealthSentencesᵢₜ | ln(1 + PosHealthSentencesᵢₜ) | Disclosure quantity measure |
| HealthDisclosureᵢₜ | 1 if PosHealthSentencesᵢₜ > 0; 0 otherwise | Disclosure extensive-margin measure |
| HealthFrequency10kᵢₜ | 10,000 × PosHealthSentencesᵢₜ / ValidSentencesᵢₜ | Standardized frequency measure |
| CandidatePositiveRateᵢₜ | PosHealthSentencesᵢₜ / CandidateSentencesᵢₜ | Positive-hit rate among recalled candidate sentences |

Notes: The baseline measure is model-identified health-investment sentences divided by all valid CSR sentences.

## **E7. Quality checks and robustness design**

The text-measurement procedure includes multidimensional quality checks covering text quality, annotation quality, model quality, false-positive risk, industry contamination and extreme values.

**Supplementary Table S12. Text-measurement quality checks.**

| Check | Implementation |
| --- | --- |
| Text quality | Annual report counts, average valid sentences, short-text ratio and noise-file ratio |
| Annotation quality | Positive-negative label distribution, consistency checks and disputed-sample review |
| Model quality | Accuracy, precision, recall, F1, AUC and confusion matrix |
| False-positive risk | Dedicated review of healthy development, big health, customer health and other high-risk contexts |
| Industry contamination | Checks for pharmaceutical, food and beverage, insurance and other industries with product-health language |
| Extreme values | Manual review of the top 20 firm-year observations by health-investment text intensity |

Notes: Robustness designs use alternative text indicators, prediction thresholds and valid-sentence filters.

# **Supplementary References**

**1. Xu, X. et al. FinBERT2: A specialized bidirectional encoder for bridging the gap in finance-specific deployment of large language models. Proc. 31st ACM SIGKDD Conf. Knowl. Discov. Data Min. 5117-5128, https://doi.org/10.1145/3711896.3737219 (2025).**
